# Supplementary material for: Association of β2-adrenergic receptor gene polymorphisms (rs1042713, rs1042714, rs1042711) with asthma risk: a systematic review and updated meta-analysis
Source: BMC Pulm Med. 2019 Nov 7;19:202. doi: 10.1186/s12890-019-0962-z (PMC6836544; doi:10.1186/s12890-019-0962-z)
Supplement: Supplementary file 2 — Additional file 2: Table S2. Genotype and allele distribution in the meta-analysis for the rs1042713 polymorphism. (XLSX 17 kb) [file 12890_2019_962_MOESM2_ESM.xlsx]

## Sheet: Sheet1
Table S2. Genotype and allele distribution in the meta-analysis for the rs1042713 polymorphism
First author	Year	Country	Ethnicity	Age group	Case			Control			Case		Control		HWE(p)
					AA	AG	GG	AA	AG	GG	A	G	A	G
Alghobashy	2018	Egypt	non-Hispanic Blacks	Children	46	48	10	41	6	5	140	68	88	16	0
Almomani	2017	Jordan	Arab	Adult	26	109	106	46	119	83	161	321	211	285	0.771
Guo	2016	China	East-Asian	Adult	84	218	38	116	184	40	386	294	416	264	0.01
Kaymak	2016	Turkish	Turk	Adult	14	63	52	31	46	50	91	167	108	146	0.004
Sahi	2016	India	Indian	Children	29	62	29	19	56	19	120	120	94	94	0.063
Tian	2016	China	East-Asian	Children	104	145	49	90	154	60	353	243	334	274	0.687
Bandaru	2015	India	Indian	Adult	144	128	126	143	171	142	416	380	457	455	0
Martinez	2015	Mexico	Hispanic-Latinos	Children	93	181	147	142	211	77	367	475	495	365	0.928
Ramphul	2015	Mauritian	non-Hispanic Blacks	Children	38	96	57	43	91	54	172	210	177	199	0.695
Shah	2015	India	Indian	Adult	26	52	34	25	71	31	104	120	121	133	0.174
de Paiva	2014	Brazil	Hispanic-Latinos	Children	28	38	22	9	59	73	94	82	77	205	0.521
Liu	2014	China	East-Asian	Adult	150	209	70	153	237	93	509	349	543	423	0.943
Petrovic	2014	Serbian	Caucasian	Adult	67	39	65	35	25	41	173	169	95	107	0
Ramphul	2014	China	East-Asian	Children	46	100	46	30	76	86	192	192	136	248	0.062
Kaneko	2013	Japan	East-Asian	Adult	220	430	212	287	677	322	870	854	1251	1321	0.054
Karam	2013	Egyptian	non-Hispanic Blacks	Children	23	40	27	44	50	16	86	94	138	82	0.77
Larocca	2013	Venezuelan	Hispanic-Latinos	Adult	30	58	17	47	35	18	118	92	129	71	0.018
Pino	2013	Spain	Caucasian	Children	104	286	206	228	576	436	494	698	1032	1448	0.121
Saadi	2013	India	Indian	both	58	57	35	31	66	53	173	127	128	172	0.218
Birbian	2012	India	Indian	Adult	62	199	149	48	188	178	323	497	284	544	0.878
He	2012	China	East-Asian	Adult	32	130	9	50	66	32	194	148	166	130	0.249
Isaza	2012	Colombia	Hispanic-Latinos	Children	30	39	40	48	42	47	99	119	138	136	0
Thomsen	2012	Denmark	Caucasian	Adult	84	256	207	1243	3866	3277	424	670	6352	10420	0.062
Yang	2012	China	East-Asian	Children	78	104	30	24	23	5	260	164	71	33	0.725
Zheng	2012	China	East-Asian	Children	77	99	28	31	55	24	253	155	117	103	0.966
Fu	2011	China	East-Asian	Adult	85	88	65	106	92	67	258	218	304	226	0
Kohyama	2011	Japan	East-Asian	Adult	40	160	100	15	50	35	240	360	80	120	0.677
Ye	2011	China	East-Asian	Adult	5	19	7	5	26	6	29	33	36	38	0.013
Qiu	2010	China	East-Asian	Adult	77	85	39	88	135	53	239	163	311	241	0.924
Li	2009	China	East-Asian	Children	86	76	30	46	100	46	248	136	192	192	0.564
Liu	2009	China	East-Asian	Adult	27	59	34	23	71	26	113	127	117	123	0.044
Llanes	2009	Spain	Caucasian	Adult	17	54	37	8	25	17	88	128	41	59	0.813
Lv	2009	China	East-Asian	Children	30	76	86	46	100	46	136	248	192	192	0.564
Szczepankiewicz	2009	Polish	Caucasian	Children	16	48	49	26	54	41	80	146	106	136	0.304
Wang	2009	China	East-Asian	Children	138	207	97	173	250	87	483	401	596	424	0.837
Chan	2008	China	East-Asian	Children	101	135	59	51	89	33	337	253	191	155	0.597
Shi	2008	China	East-Asian	Both	22	19	7	10	25	13	63	33	45	51	0.751
Xie	2008	China	East-Asian	Children	14	37	6	21	34	7	65	49	76	48	0.22
Zhang	2008	China	East-Asian	Children	81	111	25	19	23	8	273	161	61	39	0.814
Cui	2007	China	East-Asian	Adult	9	55	8	12	39	9	73	71	63	57	0.019
Neslihan	2007	Turkish	Turk	Unknown	-	-	-	-	-	-	91	167	108	146	-
Tuerxun	2007	China	East-Asian	Adult	13	36	27	26	54	9	62	90	106	72	0.014
Matheson	2006	Australia	Caucasian	Adult	18	69	36	21	102	98	105	141	144	298	0.452
Munakata	2006	Japan	East-Asian	Unknown	14	21	11	23	47	30	49	43	93	107	0.58
Tsai	2006	Unknown	non-Hispanic Blacks	Both	-	-	-	-	-	-	285	243	162	190	-
Tellería	2006	Spain	Caucasian	Both	13	43	24	17	29	18	69	91	63	65	0.454
Bhatnagar	2005	India	East-Asian	Adult	19	54	28	12	30	13	92	110	54	56	0.499
Feng	2004	China	East-Asian	Adult	13	35	26	6	28	5	61	87	40	38	0.006
Gao	2004	China	East-Asian	Adult	38	59	28	35	53	8	135	115	123	69	0.051
Wang	2004	China	East-Asian	Adult	48	59	16	26	54	9	155	91	106	72	0.014
Binaei	2003	USA	Caucasian	Children	7	24	7	34	67	54	38	38	135	175	0.132
Lin	2003	China	East-Asian	Children	34	35	11	27	25	17	103	57	79	59	0.031
Santillan	2003	Mexican	Hispanic-Latinos	Adult	56	163	84	101	318	185	275	331	520	688	0.07
Shachor	2003	Israel	Arab	Both	11	38	17	26	52	35	60	72	104	122	0.433
Dai	2002	China	East-Asian	Adult	33	33	21	36	33	25	99	75	105	83	0.005
Leung	2002	China	East-Asian	Children	25	38	13	22	37	11	88	64	81	59	0.483
Barr	2001	USA	Caucasian	Adult	36	97	38	51	62	24	169	173	164	110	0.495
Hakonarson	2001	Iceland	Caucasian	Both	45	151	127	21	85	75	241	405	127	235	0.677
Liao	2001	China	East-Asian	Children	12	27	11	35	46	19	51	49	116	84	0.577
Wang	2001	China	East-Asian	Adult	25	54	22	38	64	34	104	98	140	132	0.499
Xing	2001	China	East-Asian	Adult	9	62	29	29	55	16	80	120	113	87	0.234
Gao	2000	China	East-Asian	Both	14	26	18	12	68	9	54	62	92	86	0
Holloway	2000	New Zealand	Caucasian	Adult	78	47	29	35	39	17	203	105	109	73	0.303
Kotani	1999	Japan	East-Asian	Adult	30	52	35	28	45	30	112	122	101	105	0.201
Dewar	1998	UK	Caucasian	Adult	14	50	53	74	263	180	78	156	411	623	0.158
Hopes	1998	UK	Caucasian	Children	11	54	37	28	147	142	76	128	203	431	0.158
Weir	1998	Unknown	Caucasian	Adult	-	-	-	-	-	-	195	125	102	66	-
Weir	1998	Unknown	East-Asian	Adult	-	-	-	-	-	-	13	19	62	62	-
Martinez	1997	USA	Caucasian	Children	5	18	15	33	108	88	28	48	174	284	0.988
Potter	1993	South africa	non-Hispanic Blacks	Children	9	9	4	6	15	9	27	17	27	33	0.956
Reihsaus	1993	USA	Caucasian	Adult	5	19	27	7	16	33	29	73	30	82	0.042
